# Supplementary material for: A Liquid Chromatography-High Resolution Mass Spectrometry (LC-HRMS) Method for the Determination of Free Hydroxy Fatty Acids in Cow and Goat Milk
Source: PubMed Central journal article supplement (PMC7504762; doi:10.3390/molecules25173947), 2020-08-29
Supplement: molecules-25-03947-s001.pdf [file molecules-25-03947-s001.pdf]

# **SUPPLEMENTARY MATERIALS**

## **A Liquid Chromatography-High Resolution Mass Spectrometry (LC-HRMS) Method for the Determination of Free Hydroxy Fatty Acids in Cow and Goat Milk**

Maroula G. Kokotou, Christiana Mantzourani, Asimina Bourboula, Olga G. Mountanea and George Kokotos\*

Department of Chemistry, National and Kapodistrian University of Athens, Athens 15771, Greece

| <b>Table of Contents</b>                                                                                                                                                                                                                  | <b>Page</b> |
|-------------------------------------------------------------------------------------------------------------------------------------------------------------------------------------------------------------------------------------------|-------------|
| <b>Figure S1.</b> MS/MS spectra of 2HPA (A), 3HPA (B), 7HPA (C), 8HPA (D), 9HPA (E), 10HPA (F), 11HPA (G), 16HPA (H), 2HSA (I), 3HSA (J), 7HSA (K), 8HSA (L), 9HSA (M), 10HSA (N), 12HSA (O), 3HCA (P), 3HLA (Q), 3HMA (R) and 3HPDA (S). | <b>S2</b>   |
| <b>Figure S2.</b> Principal component analysis (PCA) Scree plot of HFAs from cow and goat milk.                                                                                                                                           | <b>S5</b>   |

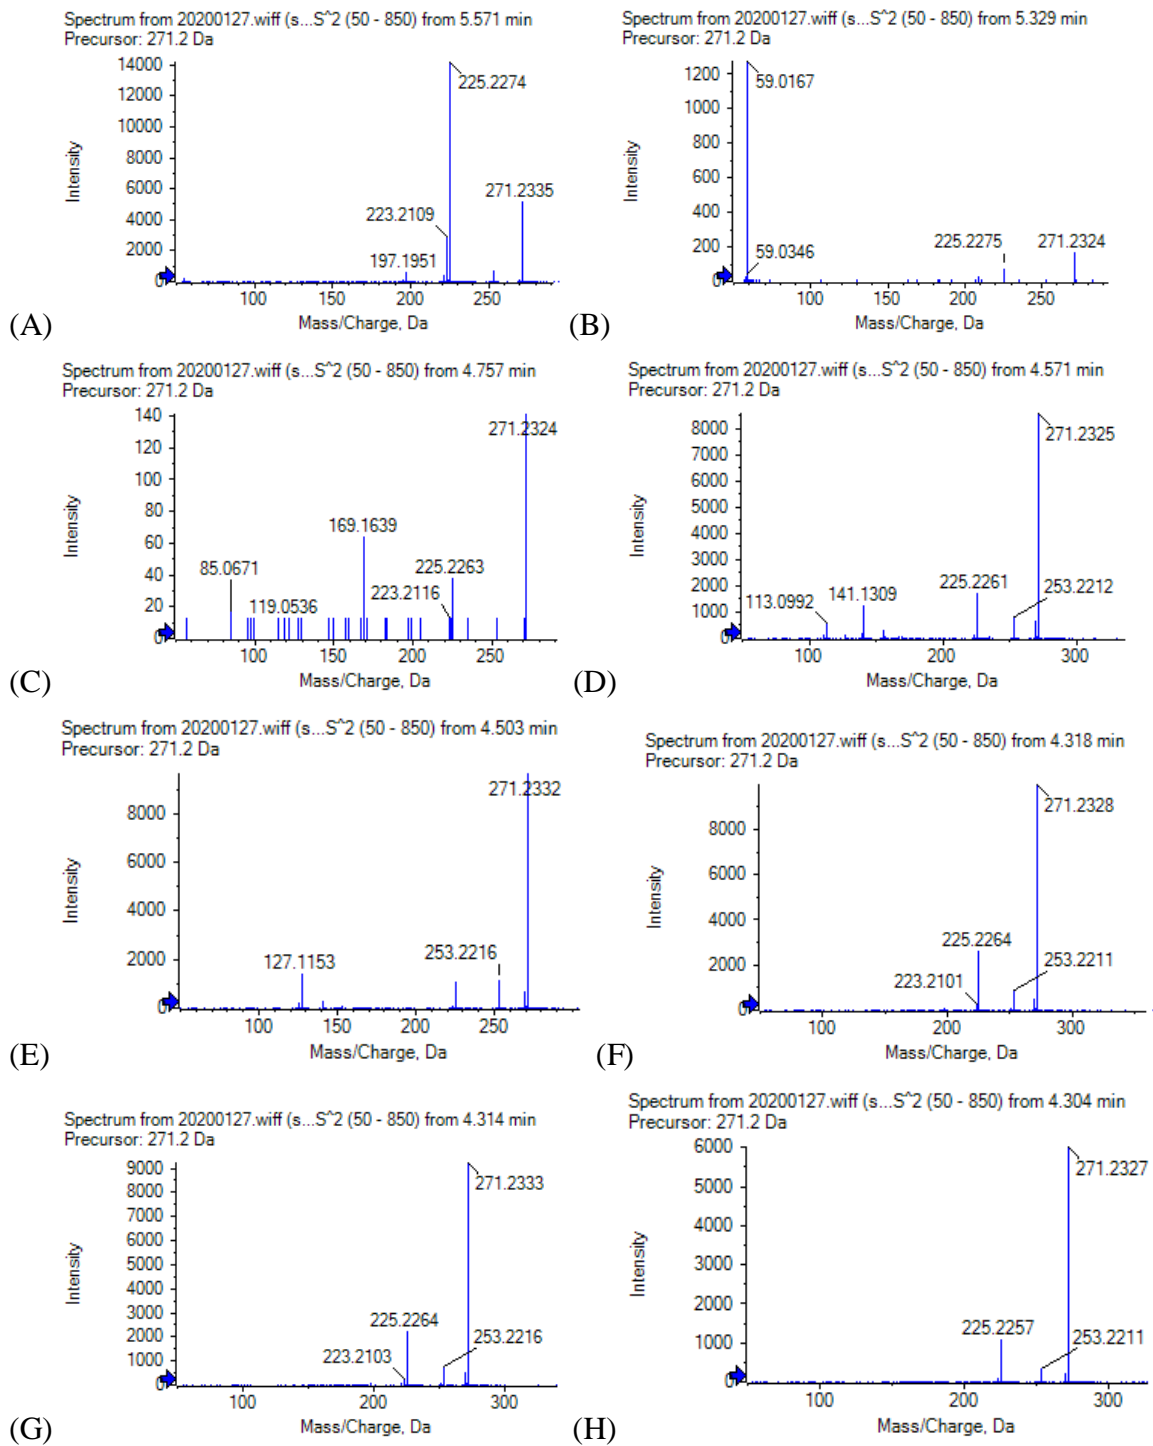

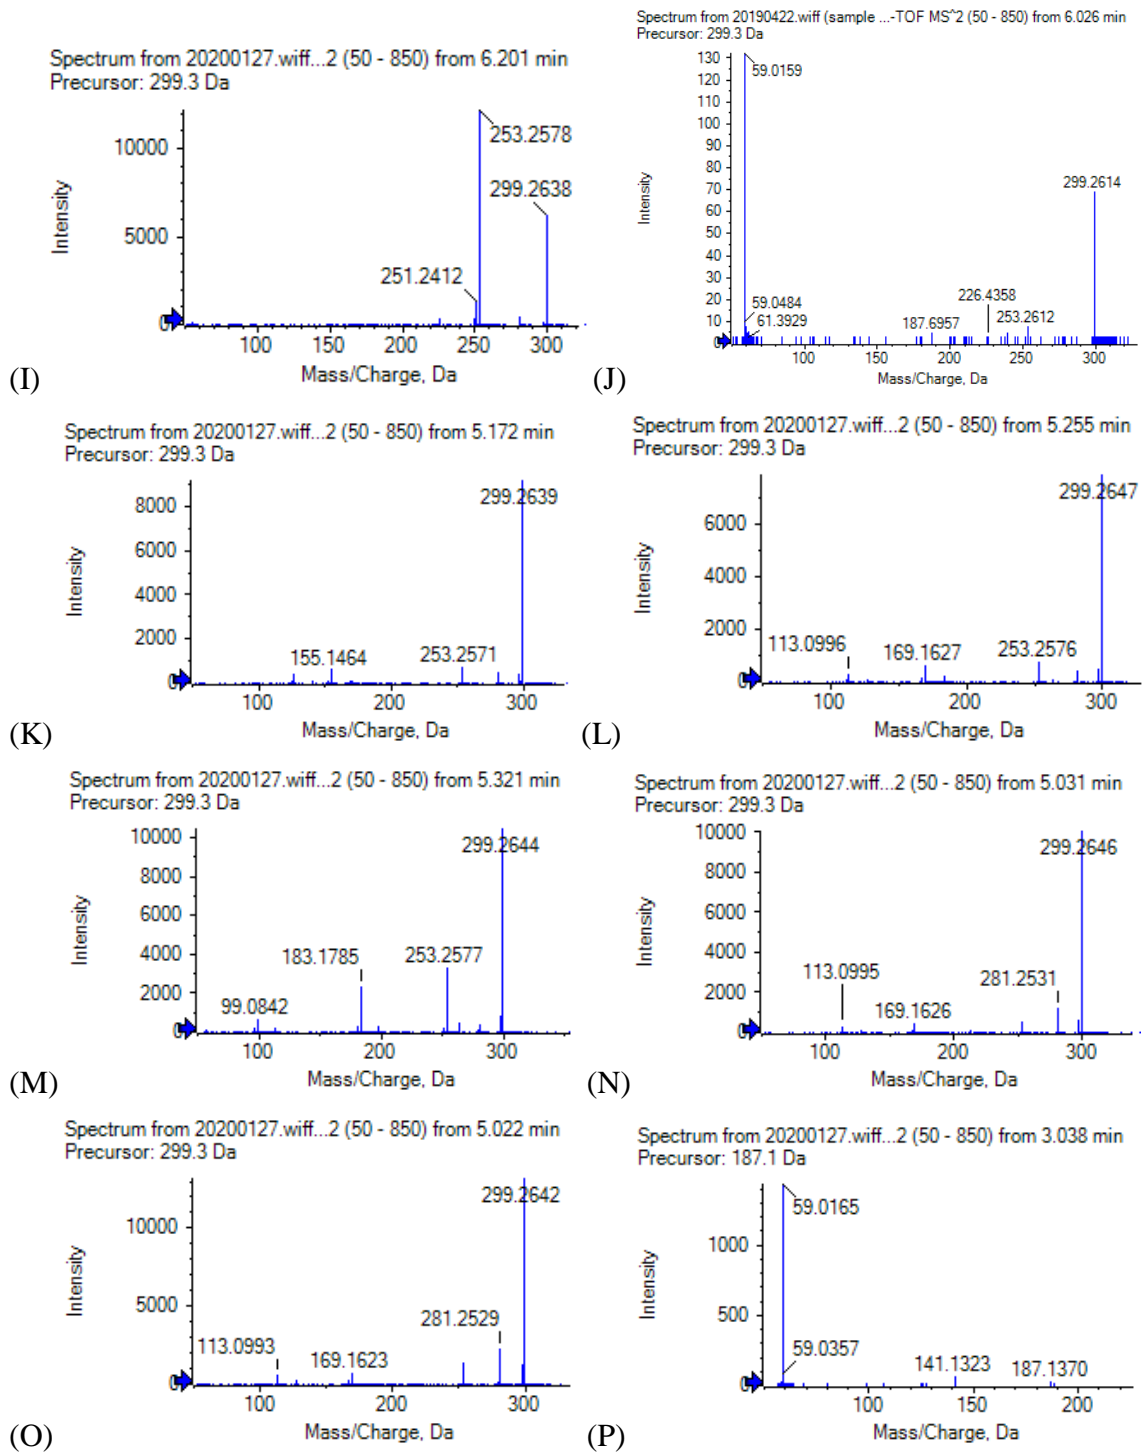

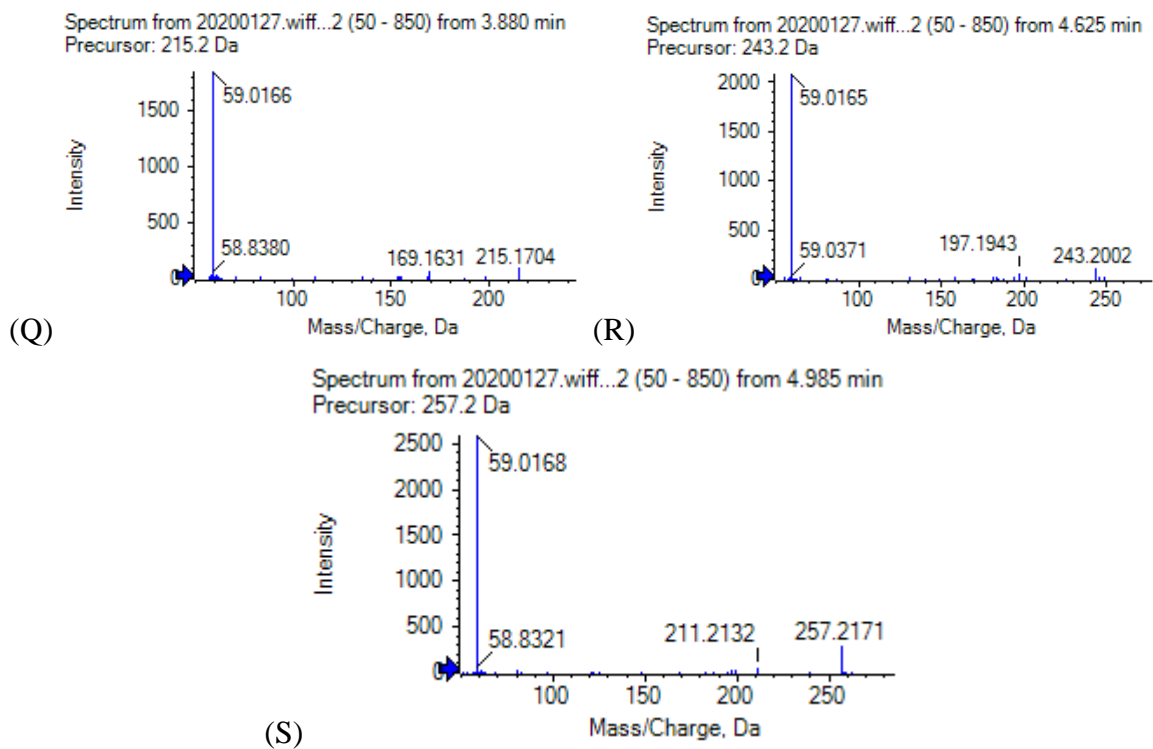

**Figure S1.** MS/MS spectra of 2HPA (A), 3HPA (B), 7HPA (C), 8HPA (D), 9HPA (E), 10HPA (F), 11HPA (G), 16HPA (H), 2HSA (I), 3HSA (J), 7HSA (K), 8HSA (L), 9HSA (M), 10HSA (N), 12HSA (O), 3HCA (P), 3HLA (Q), 3HMA (R) and 3HPDA (S).

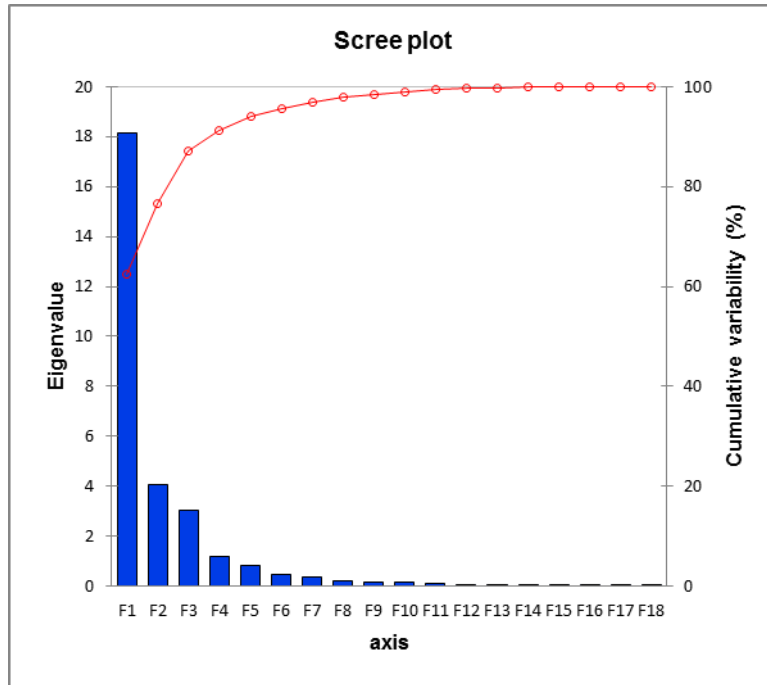

**Figure S2.** Principal component analysis (PCA) Scree plot of HFAs from cow and goat milk.
